# Supplementary material for: The function of zebra stripes
Source: Springer Nature journal article supplement (doi:10.1038/ncomms4535), 2014-04-01
Supplement: 41467_2014_BFncomms4535_MOESM1043_ESM.pdf [file 41467_2014_BFncomms4535_MOESM1043_ESM.pdf]

## Supplementary information

**Supplementary table 1:** Diseases infecting equids that are transmitted by biting flies in Africa

| Disease Name                       | Transmitted by:   |                   |                   |                  |                  | Known in zebra?     | Disease effects in equids:                                                                                                                                                               | Disease effects in artiodactyls:                                                                                                                           |
|------------------------------------|-------------------|-------------------|-------------------|------------------|------------------|---------------------|------------------------------------------------------------------------------------------------------------------------------------------------------------------------------------------|------------------------------------------------------------------------------------------------------------------------------------------------------------|
|                                    | Horsefly          | Tsetse Fly        | Stable Fly        | Mosquito         | Midge            |                     |                                                                                                                                                                                          |                                                                                                                                                            |
| <b>Trypanosomosis: Nagana</b>      | Yes <sup>1</sup>  | Yes <sup>2</sup>  |                   |                  |                  | Yes <sup>3</sup>    | Fever, weakness, lethargy, weight loss; eventual death in all domestics unless treated <sup>3</sup>                                                                                      | Cattle, sheep, goats: similar symptoms <sup>3</sup><br>Many wild ungulates native to Africa show no evidence of harm <sup>1</sup>                          |
| <b>Equine infectious anemia</b>    | Yes <sup>4</sup>  |                   | Yes <sup>4</sup>  |                  |                  | Yes <sup>5</sup>    | Anemia, swelling, death, fetal abortion <sup>6</sup>                                                                                                                                     | Not known outside of equids <sup>1</sup>                                                                                                                   |
| <b>African horse Sickness*</b>     | Yes <sup>7</sup>  |                   |                   |                  | Yes <sup>8</sup> | Yes <sup>1</sup>    | Fever followed by dyspnea and spasmodic coughing. Death within a week, recovery rare. <sup>1</sup> Zebra often experience inallarent form of disease with prolonged viremia <sup>9</sup> | Disease unknown outside of equids <sup>10</sup> although antibodies detected in other animals <sup>1</sup>                                                 |
| <b>Anaplasmosis</b>                | Yes <sup>11</sup> |                   |                   |                  |                  | Yes <sup>2</sup>    | Inappetence, loss of coordination, breathlessness when exerted, and a rapid bounding pulse <sup>7</sup>                                                                                  | Cattle, sheep, goats, buffalo, and some wild ruminants: similar symptoms <sup>1</sup>                                                                      |
| <b>Anthrax</b>                     | Yes <sup>6</sup>  |                   |                   |                  |                  | Yes <sup>1</sup>    | Fever, sudden death <sup>9</sup>                                                                                                                                                         | Cattle and sheep: same effects <sup>1</sup>                                                                                                                |
| <b>Babesiosis</b>                  | Yes <sup>7</sup>  |                   |                   |                  |                  | Yes <sup>7</sup>    | Persistent fever, inappetence, weight loss <sup>1</sup>                                                                                                                                  | Cattle, sheep, goats (wide range): similar symptoms <sup>1</sup>                                                                                           |
| <b>Equine Influenza</b>            | Yes <sup>2</sup>  |                   |                   |                  |                  | Yes <sup>1</sup>    | Respiratory infection, fatal particularly in zebras <sup>1</sup>                                                                                                                         | Not known outside of equids <sup>1</sup>                                                                                                                   |
| <b>Eastern Equine Encephalitis</b> |                   |                   |                   | Yes <sup>1</sup> |                  | Yes <sup>12</sup>   | paralysis, seizures, and death Mortality 90% <sup>1</sup>                                                                                                                                | Other arboviruses cause diseases in other animals. Those that cause EEE are transmitted by mosquitoes and birds, and can infect other mammals <sup>1</sup> |
| <b>Equine Encephalosis*</b>        |                   |                   |                   |                  | Yes <sup>7</sup> | Yes <sup>13</sup>   | One to five days of fever, inappetence, sometimes females abort. Infects all equids. Clinical signs only seen in horses <sup>13</sup>                                                    | Not known outside of equids, although some evidence elephants may become infected <sup>13</sup>                                                            |
| <b>Trypanosomosis: Dourine*</b>    | Yes <sup>7</sup>  |                   |                   |                  |                  | Likely <sup>2</sup> | Paralysis, progressive emaciation. Fatality 50-70% <sup>1</sup>                                                                                                                          | Not known outside of equids <sup>2</sup>                                                                                                                   |
| <b>Trypanosomosis: Surra</b>       | Yes <sup>14</sup> | Yes <sup>14</sup> | Yes <sup>10</sup> |                  |                  | Not known           | Fever, weakness, lethargy, weight loss; fatal when not treated <sup>15</sup>                                                                                                             | All domestic animals susceptible, similar symptoms <sup>1</sup>                                                                                            |

\* disease found only in Africa

## **Supplementary note 1:**

### **Photograph sources**

Photographs used for scoring animal pelage were obtained from reputable sources (see the list below) on the internet and print. “Reputable” sources are those such as encyclopedic websites, published mammalogy books, zoo websites, national park websites, and other peer-reviewed sources; no image was taken from an individual’s personal or unidentified website. Only photographs with accurately identified animals where the entire animal could be seen were used. Only one animal per photograph was scored. Superscripts refer to references not found in the main text. Sources used are:

#### Plains Zebra: Damara (*Equus burchelli antiquorum*)

Macdonald (1984)<sup>16</sup> p. 120

Groves (1974) p. 72

Madamzebra.com

flickr.com

123rf.com

biology4kids.com

oregonzoo.com

zooinstitutes.com (cincinatti)

zooinstitutes.com (Izhevsk)

zooinstitutes.com (Riga)

zooinstitutes.com (Philly)

zooinstitutes.com (Kerkrade)

#### Plains Zebra: Burchell’s (*Equus burchelli burchellii*)

Macdonald (1984)<sup>16</sup> p. 109

theequinest.com

petermass.nl (photo of specimen from Berlin's Museum fur Naturkunde)

biopix.com

treknature.com

pawsforwildlife.co.uk

biolib.cz

calphotos.berkeley.edu

wikipedia.org

commons.wikimedia.org

#### Plains Zebra: Chapman’s (*Equus burchelli chapmannii*)

Macdonald (1984)<sup>16</sup> p. 132

shoarns.com  
 zoobarcelona.cat  
 theequinest.com  
 wikipedia  
 zoochat.com  
 de.wikipedia.org  
 zoo-safari.com.pl (upper)  
 jameshagerphoto.com  
 biolib.cz  
 arkive.org

Plains Zebra: Crawshay's (*Equus burchelli crawshayi*)

Madamzebra.com  
 theequinest.com  
 arkive.org  
 wikipedia  
 pawsforwildlife.co.uk  
 en.wikipedia.org  
 africaimagelibrary.com

Plains Zebra: Upper Zambezi (*Equus burchelli zambeziensis*)

<http://www.africabespoke.com/wp-content/uploads/2009/05/Lochinvar-National-Park-150x150.jpg>  
<http://www.jenmansafaris.com/african-countries/tanzania/attractions/saadani-national-park.html>  
<http://www.zambia-the-african-safari.com/images/zebras2.jpg>  
<http://www.noble-minded.org/photography.html>  
<http://www.sunsafaris.com/safari/zambia/kafue-national-park/>  
<http://www.yukiba.com/7433-zambia-africa-photo.html>  
<http://www.rainbowsafaris.biz/Kafue.html>  
<http://www.justluxe.com/travel/luxury-vacations/feature-1428217.php>

Plains Zebra: Grant's (*Equus burchelli boehmi*)

Macdonald (1984)<sup>16</sup> p. 132  
 Madamzebra.com  
 treknature.com  
 theequinest.com  
 en.wikipedia.org  
 brightszoo.com  
 wikipedia.com  
 naturephoto-cz.com  
 pawsforwildlife.co.uk  
 johnwasserman.com  
 zoochat.com

Plains Zebra: Quagga (*Equus burchelli quagga*) EXTINCT

Macdonald (1984)<sup>16</sup> p. 137

Groves (1974) p. 72

<http://www.quaggaproject.org/>; Amsterdam specimen

<http://www.quaggaproject.org/>; Bamberg specimen

<http://www.quaggaproject.org/>; Basle specimen

<http://www.quaggaproject.org/>; Berlin specimen

<http://www.quaggaproject.org/>; Darmstadt

<http://www.quaggaproject.org/>; Edinburgh

<http://www.quaggaproject.org/>; Frankfurt

<http://www.quaggaproject.org/>; Kazan

<http://www.quaggaproject.org/>; Leiden

<http://www.quaggaproject.org/>; Mainz

Grevy's Zebra (*Equus grevyi*)

Macdonald (1994)<sup>16</sup> p. 110

Macdonald (1994)<sup>16</sup> p. 119

Macdonald (1994)<sup>16</sup> p. 128

Macdonald (1994)<sup>16</sup> p. 134

Hosking & Withers; Larger Mammals of East Africa p.77

wikipedia

art.com

carnivoraforum.com

wikimedia commons.org

madamzebra.com

theequinest.com

Mountain Zebra: Hartman's (*Equus zebra hartmannae*)

Macdonald (1984)<sup>16</sup> p. 111

Groves (1974) p. 71

Nowak (1999)<sup>17</sup> p. 1021

Frandsen (1992)<sup>18</sup> p. 144

biodiversityexplorer.org

Madamzebra.com (upper)

madamzebra.com (lower)

shoarns.com

zoochat.com

arkive.org

Mountain Zebra: Cape (*Equus zebra zebra*)

Macdonald (1984)<sup>16</sup> p. 123

Macdonald (1984)<sup>16</sup> p. 133

Groves (1974) p. 71

Maberly & Goss (1986)<sup>19</sup> (plate)

Frandsen (1992)<sup>18</sup> p. 142

Madamzebra.com

biodiversityexplorer.org

sout-africa-tours-and-travel-com

arkive.org

African Wild Ass: Somali (*Equus africanus somaliensis*)

sandiegozoo.org  
 ln.wikipedia.org  
 arkive.org  
 okapia.wordpress.com  
 zoochat.com  
 en.wikipedia.org  
 treknature.com  
 biolib.cz  
 factzoo.com  
 theequineest.com

African Wild Ass: Nubian (*Equus africanus africanus*)

Kimura et al. (2010) fig. 1  
<http://dpc.uba.uva.nl/cgi/t/text/text-idx?c=zoomed;sid=b1971dea61cd3bc2aa0902085c8e9883;rgn=main;idno=m8101a06;view=text>  
 Groves (1974)  
 egyptheritage.com  
 mustangs4us.com  
 animalinfo.org  
 biogeodb.stri.si.edu  
 flickr.com

African Wild Ass: Atlas (*Equus africanus atlanticus*) EXTINCT

Kimura et al. (2010) (drawing, fig 1)

Przewalski's Horse (*Equus ferus przewalskii*)

IUCN p. 82  
 en.wikipedia.org  
 worldwildlife.org  
 quantum-conservation.org  
 conservationcenters.org  
 arkive.org  
 britannica.hk

Kiang: Eastern (*Equus kiang holdereri*)

arkive.org  
[http://animaldiversity.ummz.umich.edu/site/resources/david\\_blank/kiang.jpg/view.html](http://animaldiversity.ummz.umich.edu/site/resources/david_blank/kiang.jpg/view.html)  
 cs.wikipedia.org  
 biolib.cz  
 zt.tibet.cn  
 etc.usf.edu

Kiang: Western (*Equus kiang kiang*)

<http://wgbis.ces.iisc.ernet.in/energy/water/paper/TR123/section5.htm>  
<http://www.asmjournals.org/doi/abs/10.1644/835.1.?journalCode=mmssp>  
 wildlife of the tibetan steppe, by Schaller

Kiang: Southern (*Equus kiang polyodon*)  
Schaller (1998)<sup>20</sup> p.169

Asiatic Wild Ass: Mongolian Khulan (*Equus hemionus hemionus*)  
arkive.org

Asiatic Wild Ass: Gobi Khulan (*Equus hemionus leuteus*)  
[http://reino-animal.webege.com/detalle.php?id\\_especie=110](http://reino-animal.webege.com/detalle.php?id_especie=110)  
<http://www.cryptomundo.com/cryptozoo-news/kulan-zoo/>  
<http://dtbook.egloos.com/9326537>  
<http://www.equids.org/aswildass.php>  
<http://www.zoobojnice.sk/cicavce/zivocich/kulan-turkmensky>  
[http://www.edgeofexistence.org/mammals/species\\_info.php?id=14](http://www.edgeofexistence.org/mammals/species_info.php?id=14)

Asiatic Wild Ass: Kulan (*Equus hemionus kulan*)  
arkive.org

Asiatic Wild Ass: Onager (*Equus hemionus onager*)  
IUCN book p. 62  
arkive.org

Asiatic Wild Ass: Indian (*Equus hemionus khur*)  
IUCN book p. 63  
arkive.org

Asiatic Wild Ass: Syrian (*Equus hemionus hemippus*) EXTINCT  
[http://en.wikipedia.org/wiki/Syrian\\_wild\\_ass](http://en.wikipedia.org/wiki/Syrian_wild_ass)  
<http://www.biolib.cz/en/image/id172157/>

### **Supplementary note 2: Group sizes**

Mean and maximum herd sizes respectively: *E. przewalski* 7.0, 20<sup>ref 21</sup>; *E. zebra* 4.7<sup>ref 22</sup>, 13<sup>ref 21</sup>; *E. burchelli* 5.6<sup>ref 23</sup>, 16<sup>ref 21</sup>; *E. hemionus* 6.3, 850<sup>ref 24</sup>; *E. grevyii* 5.1<sup>ref 25</sup>, 150<sup>ref 26</sup>; *E. kiang* 8.9, 500<sup>ref 27</sup>; *E. africanus* 4.0, 49<sup>ref 28</sup>.

### **Supplementary note 3: Derivation of phylogenies**

We downloaded a consensus phylogenetic tree of all seven species from the 10KTrees website<sup>29</sup>; a polytomy between *E. kiang*, *E. hemionus*, and *E. africanus* was resolved using the *multi2di* function of the “ape” package<sup>30</sup> in R<sup>31</sup>. This tree was used to run all species level statistical tests and served as the base for the subspecies level tree. We resolved the subspecies of *E. burchelli* as follows: *E. b. boehmi* was placed ancestral to *E. b. quagga* and other subspecies following<sup>32</sup>; *E. b. quagga* was placed ancestral to the remaining *E. burchelli* subspecies because it is often listed as a separate species<sup>33</sup>; *E. b. chapmanii* and *E. b. antiquorum* were set as sister taxa because they are currently recognized as the same subspecies<sup>33</sup>, although there is disagreement as to this point. The relationship between the three subspecies of *E. africanus* is unclear because *E. a. atlanticus* is extinct; we set these subspecies as a polytomy. The validity of the three subspecies of *E. kiang* is also unclear and may just represent a cline; therefore, we set these subspecies as a polytomy. The *E. kiang* and *E. asinus* polytomies were both resolved as described above using the *multi2di* function. While some have placed *E. kiang* and *E. hemionus* as sister taxa<sup>34-36</sup>, we followed Harris and Porter<sup>37</sup> and Kruger et al.<sup>38</sup> by placing the subspecies of *E. kiang* as derived from the subspecies of *E. hemionus*. Following ref 38, we placed *E. kiang* as sister to *E. h. leuteus*, *E. h. kulan* as ancestral to both *E. kiang* and *E. h. leuteus*, and *E. h. khur* sister to *E. h. kulan*. Following refs 37 and 38 we placed *E. h. onager*

ancestral to this entire group (*E. kiang*, *E. h. leuteus*, *E. h. khur*, *E. h. kulan*) and *E. h. hemippus* was placed ancestral to all other *E. heminous* and *E. kiang* subspecies. *E. b. crawshayii*, *E. b. zambeziensis*, and *E. h. heminous* were excluded from the tree and all further analyses due to a lack of published evidence of their relationships to other subspecies. Branch lengths on the subspecies tree initially based on those of the consensus tree and the remaining branch lengths within each species were divided up equally.

#### **Supplementary note 4:**

We placed a millimeter metal ruler a nine places on museum pelts of these species<sup>39</sup>: forehead, neck, side, belly, mid-rump, upper and lower forelegs and hindlegs, and measured the depth of fur perpendicular to the skin<sup>40</sup>; we measured and length of the longest hair shafts at eight sites: neck, side, belly, buttock, upper and lower hindlimbs. In addition we measured widths of both black and white stripes along “transects” on the cheek (muzzle to ear), neck (ear to forelimb), side (middle of body from forelimb to hindlimb), rump (diagonal line beginning at point on spine above the hindlimb stretching to lower edge of rump for Mountain and Burchell’s zebra, but from anus to Y shape and then Y shape to lower edge of rump in Grevy’s zebra), foreleg, and hindleg. Different transects were averaged across individuals of each species and then an average was calculated for the three zebra species. We used average stripe widths at each point across pelts of the same species. We extracted lengths of biting fly mouthparts from the literature<sup>41-43</sup>.



### Supplementary references

1. Aiello, S.E. The Merck Veterinary Manual Online. Merck Sharp & Dohme Corp. Accessed April 25, 2013 < <http://www.merckmanuals.com/vet/index.html>> (2002-2012).
2. Foil, L.D. Tabanids as Vectors of Disease Agents. *Parasitology Today* **5**, 88-96 (1989).
3. Spinage, C.A. *African Ecology: Benchmarks and Historical Perspectives*. (Springer, New York, 2012).
4. Factsheets. Equine Infectious Anemia. The Center for Food Security and Public Health, Iowa State University Accessed April 25, 2013 < [http://www.cfsph.iastate.edu/Factsheets/pdfs/equine\\_infectious\\_anemia.pdf](http://www.cfsph.iastate.edu/Factsheets/pdfs/equine_infectious_anemia.pdf)> (2009)
5. Yapic, O. *et al.* An investigation of equine infectious anemia infection in the Central Anotolia region of Turkey. *S. Afr. Vet. Ver.* **78**, 12-14 (2007)
6. Muoira, P.K. *et al.* Anthrax outbreak among Grevy's zebra (*Equus grevyi*) in Samburu, Kenya. *Afr. J. Ecol.* **45**, 483-489 (2007).
7. Radcliffe, R.M. & Osofsky, S.A. Disease Concerns for Wild Equids. in *Equids: Zebras, Asses and Horses*, (ed Moehman, P.D.) (IUCN World Conservation Union, 2002).
8. Krinsky, W.L.. Animal disease agents transmitted by horse flies and deer flies. *J. Medical Entomol.* **13**, 225-275 (1976).
9. Brown, C.C. *et al.* African Horse Sickness: An Olympic Risk? *Compendium on Continuing Education for the Practicing Veterinarian* **14**, 239-241(1992).
10. Lehane, M. *The Biology of Blood-sucking in Insects*. (Cambridge University Press, Cambridge, 2005).
11. Hornok, S. *et al.* Molecular identification of *Anaplasma marginale* and rickettsial endosymbionts in blood-sucking flies (Diptera: Tabanidae, Muscidae) and hard ticks (Acari: Ixodidae). *Vet. Parasitol.* **154**, 354-359 (2008).
12. Factsheets. Equine Encephalitis. The Center for Food Security and Public Health, Iowa State University Accessed April 25, 2013 [http://www.cfsph.iastate.edu/Factsheets/pdfs/easter\\_wester\\_venezuelan\\_equine\\_encephalomyelitis.pdf](http://www.cfsph.iastate.edu/Factsheets/pdfs/easter_wester_venezuelan_equine_encephalomyelitis.pdf) (2009).
13. Wohlfender, F. Equine Encephalosis—an emerging threat. *DEFRA/AHT/BEVA Equine Quarterly Disease Surveillance Report* **5**, 8-12 (2009)
14. Lane, R.P. & Crosskey, R.W. *Medical Insects and Arachnids*. (Chapman & Hall, London, 1996).

15. The World Organization for Animal Health (OIE). Trypanosmosis (Tsetse Transmitted). OIE Technical Disease Cards. Accessed April 25, 2013  
[http://www.oie.int/fileadmin/Home/eng/Animal\\_Health\\_in\\_the\\_World/docs/pdf/VEE\\_FINAL.pdf](http://www.oie.int/fileadmin/Home/eng/Animal_Health_in_the_World/docs/pdf/VEE_FINAL.pdf) (2009).
16. Macdonald, D.W. *The Encyclopedia of Mammals*. (Allen & Unwin, London, 1984).
17. Nowak, R.M. *Walker's Mammals of the World*, 6<sup>th</sup> edn. (John Hopkins University Press, Baltimore, MD, 1999).
18. Frandsen, S. *Southern Africa's Mammals: A Field Guide, 2<sup>nd</sup> Edition*, Frandsen Publishers Ltd, (Sandton, South Africa, 1992).
19. Maberly, A.C.T. & Goss, R. *Maberly's Mammals of Southern Africa, a popular field guide*. (Delta books, Craighall, 1986).
20. Schaller, G.B. *Wildlife of the Tibetan Steppe*. (University of Chicago Press, Chicago, 1998).
21. Linklater, W.L. Adaptive explanation in socio-ecology: lessons from the Equidae. *Biol Rev* **75**, 1-20 (2000).
22. Penzhorn, B.L. & Novellie, P.A. Some behavioural traits of Cape mountain zebras (*Equus zebra zebra*) and their implications for the management of a small conservation area. *Appl. Anim. Behav. Sci.* **29**, 293-299 (1991).
23. P. Grubb *Equus burchelli*. *Mammalian Species* **157**, 1-9 (1981).
24. Feh, C. *et al.* Ecology and social structure of the Gobi khulan *Equus hemionus* subsp. in the Gobi B National Park, Mongolia. *Biol. Cons.* **101**, 51-61 (2001).
25. Sundaresan, S.R. *et al.* Network metrics reveal differences in social organization between two fission-fusion species, Grevy's zebra and onager. *Oecologia* **151**, 140-149 (2007).
26. Williams, S.D. *Equus grevyi*, Grevy's zebra. in *Mammals of Africa, Volume V. Carnivores, pangolins, equids and rhinoceroses* (eds Kingdon, J. & Hoffmann, M.) 422-428. (Bloomsbury, London, 2013).
27. St- Louis, A. & Cote, S.D. *Equus kiang* (Perissodactyla: Equidae). *Mammalian Species* **835**, 1-11 (2009).
28. Klingel, H. Observations on social organization and behaviour of African and Asiatic wild asses (*Equus africanus* and *Equus hemionus*). *Z. Tierpsychol.* **44**, 323-331 (1977).
29. Arnold, C., Matthews, L.J. & Nunn, C.L. The 10kTrees Website: A New Online Resource for Primate Phylogeny. *Evol. Anthropol.* **19**, 114-118 (2010).

30. Paradis, E., Claude, J. & Strimmer, K. APE: analyses of phylogenetics and evolution in R language (ver. 3.0-1). *Bioinformatics* **20**, 289-290 (2004).
31. R Core Team. R: A Language and Environment for Statistical Computing: R Foundation for Statistical Computing, Vienna, Austria. Retrieved from <http://www.R-project.org> (2012).
32. Leonard, J.A. *et al.* A rapid loss of stripes: the evolutionary history of the extinct quagga. *Biol. Lett.* **1**, 291-295 (2005).
33. Wilson, D.E., Reeder, D.M. *Mammal species of the world: a taxonomic and geographic reference. 3<sup>rd</sup> edition*, (John Hopkins University Press, Baltimore, 1993)
34. Oakenfull, E.A., Lim, H.N. & Ryder, O. A survey of equid mitochondrial DNA: Implications for the evolution, genetic diversity and conservation of *Equus*. *Conserv. Genet.* **1**, 341-355 (2000).
35. Piras, F.M. *et al.* Phylogeny of Horse Chromosome 5q in the Genus *Equus* and Centromere Repositioning. *Cytogenet. Genome Res.* **126**, 165-172 (2009).
36. Steiner, C.C. & Ryder O.A.. Molecular phylogeny and evolution of the Perissodactyla. *Zoo. J. Linn. Soc.* **163**, 1289-1303 (2011).
37. Harris, A.H. & Porter, L.S.W. Late Pleistocene Horses of Dry Cave, Eddy County, New Mexico. *J. Mammal.* **61**, 46-65 (1980).
38. Krüger, K., Gaillard, C., Stranzinger, G. & Rieder, S. Phylogenetic analysis and species allocation of individual equids using microsatellite data. *J. Anim. Breeding Genet.* **122**, 78-86 (2005).
39. Pan, Y.S. Variation in hair characters over the body in Sahiwal zebu and jersey cattle. *Aust. J. Agric. Res.* **15**, 346-356 (1964).
40. Moen, A.N. & Severinghaus, C.W. Hair depths of the winter coat of white-tailed deer. *J. Mamm.* **65**, 497-499 (1984).
41. Jobling, B. Anatomical Drawings of Biting Flies. *British Museum* 102-104 (no date).
42. Piscioti, I.S. & Miranda, D.E. Horse flies (DIPTERA: TABANIDAE) from the “Parque Nacional Natural Chiribiquete”, Caqueta, Colombia. *Industrial University of Santander School of Biology*, 1-104 (2005).
43. Krenn, H.W. & Horst, A. Form, function and evolution of the mouthparts of blood-feeding Arthropods. *Arthropod Structure and Development* **41**, 101-118 (2012).
